# Supplementary material
Source: Royal Society of Chemistry journal article supplement (https://www.rsc.org/suppdata/p2/1998/2759/802717j.doc)
Supplement: Supplementary file 1 [file 802717j.doc]

**Solvent effects on the stability of simple secondary amides**

**K. M. Morgan and D. A. Kopp**

**Supplementary Material**

Enthalpies of solution for *N*-methyl propionamide and 2-pyrrolidinone in water, propan-1-ol, acetone and toluene were measured by calorimetry. Heats of vaporization were determined for the amides by ebulliometry, and enthalpies of solvation from the gas phase were obtained. Enthalpies of solvation were the same for the two nearly-isomeric amides in polar, protic solvent, but in acetone and toluene dimerization of 2-pyrrolidinone caused differences in enthalpies of solvation. For *N*-methyl propionamide, solvation enthalpy from the gas phase is highly correlated with the ability of the solvent to donate hydrogen bonds, but not well correlated with the ability of the solvent to accept hydrogen bonds, the polarity/polarizability of the solvent, or solvent dielectric constant.

Table 7S. Vapor Pressure/Temperature Data for *N*-methyl propionamide

| Temperature/°C | (1/*T*)/K-1 x 103 | Pressure/mm Hg | ln *P* |
| --- | --- | --- | --- |
| 121.56 | 2.534 | 31.3 | 3.44 |
| 114.38 | 2.580 | 22.5 | 3.11 |
| 105.86 | 2.638 | 14.3 | 2.66 |
| 94.92 | 2.717 | 7.9 | 2.07 |
| 126.33 | 2.503 | 38.7 | 3.66 |
| 148.32 | 2.373 | 97.0 | 4.57 |
| 139.16 | 2.425 | 67.1 | 4.21 |
| 156.26 | 2.329 | 131.1 | 4.88 |
| 165.50 | 2.280 | 182.7 | 5.21 |
| 172.35 | 2.245 | 230.6 | 5.44 |
| 184.17 | 2.187 | 338.7 | 5.83 |
| 193.57 | 2.143 | 451.6 | 6.11 |
| 200.31 | 2.112 | 551.2 | 6.31 |
| 154.66 | 2.337 | 125.0 | 4.83 |
| 149.12 | 2.368 | 101.1 | 4.62 |
| 142.31 | 2.407 | 76.9 | 4.34 |
| 133.52 | 2.459 | 53.9 | 3.99 |
| 125.23 | 2.510 | 37.1 | 3.61 |
| 117.06 | 2.563 | 25.7 | 3.25 |

Table 8S. Vapor Pressure/Temperature Data for 2-pyrrolidinone

| Temperature/°C | (1/*T*)/K-1 x 103 | Pressure/mm Hg | ln *P* |
| --- | --- | --- | --- |
| 117.86 | 2.557 | 7.1 | 1.96 |
| 133.44 | 2.459 | 15.0 | 2.71 |
| 142.64 | 2.405 | 23.9 | 3.17 |
| 150.43 | 2.361 | 32.9 | 3.49 |
| 160.16 | 2.308 | 49.2 | 3.90 |
| 165.16 | 2.281 | 59.3 | 4.08 |
| 172.56 | 2.244 | 78.8 | 4.37 |
| 181.30 | 2.200 | 106.3 | 4.67 |
| 187.26 | 2.192 | 131.8 | 4.88 |
| 191.88 | 2.150 | 161.1 | 5.08 |
| 198.27 | 2.121 | 188.5 | 5.24 |
| 202.55 | 2.102 | 244.3 | 5.50 |
| 211.38 | 2.064 | 274.2 | 5.61 |
| 199.84 | 2.114 | 192.0 | 5.26 |

Archive Entries, B3LYP/6-31G* optimizations

1. 2-pyrrolidinone

1\1\GINC-KOALA\FOpt\RB3LYP\6-31G(d)\C4H7N1O1\KMM\19-Nov-1997\0\\#N B3L

YP/6-31G* OPT\\2-pyrrolidinone, B3LYP/6-31G* opt\\0,1\O,0.0003838159,-

0.1319588321,-2.1216091333\C,-0.0084038728,-0.0649186123,-0.9052845273

\N,1.0975482866,0.0075164286,-0.093857693\C,0.8178168857,-0.073541469,

1.3320063832\C,-1.2302703097,-0.0665184429,0.0223511222\C,-0.671754047

6,0.3406392888,1.3966463131\H,1.4643242487,0.6001944415,1.9046480245\H

,0.9692487942,-1.0936010921,1.7174083451\H,2.0175059255,-0.1321967033,

-0.4893734043\H,-1.6436966236,-1.0833702675,0.0284637294\H,-2.00628054

3,0.5981751016,-0.3649708665\H,-1.1905109504,-0.1266325089,2.237999170

8\H,-0.7408313185,1.4265220975,1.5213861714\\Version=IBM-RS6000-G94Rev

D.4\HF=-286.6300977\RMSD=5.013e-09\RMSF=2.283e-05\Dipole=0.2623989,-0.

0347068,1.5131691\PG=C01 [X(C4H7N1O1)]\\@

2. N-methyl propionamide, Z conformation

1\1\GINC-KOALA\FOpt\RB3LYP\6-31G(d)\C4H9N1O1\KMM\24-Nov-1997\0\\#N B3L

YP/6-31G* OPT FREQ\\Z N-methyl propionamide, B3LYP/6-31G* freq\\0,1\O,

-0.1648508096,-1.3512661527,0.0913548492\C,-0.0032999431,-0.1368224101

,0.1287114072\N,1.2343138486,0.4477017867,0.1350166747\C,2.4657603448,

-0.3203820645,0.1331723089\C,-1.1794271173,0.8383994603,0.2012625788\C

,-2.3778718095,0.3493267476,-0.6155011847\H,3.0915531182,-0.064251162,

-0.7300456266\H,3.044564521,-0.1537494391,1.0501513829\H,2.1879962504,

-1.3736435599,0.0736858238\H,1.2919333749,1.4549385838,0.1687784099\H,

-0.8726657707,1.8433177641,-0.1172598371\H,-1.4631981146,0.9204883106,

1.2599133097\H,-2.6388871653,-0.6699579091,-0.3202751727\H,-2.14746135

28,0.3377912832,-1.6864793944\H,-3.2461941732,0.9981524431,-0.46029507

3\\Version=IBM-RS6000-G94RevD.4\HF=-287.8379367\RMSD=8.217e-09\RMSF=1.

937e-06\Dipole=0.3616811,-0.0409809,1.337475\PG=C01 [X(C4H9N1O1)]\\@

3. *N*-methyl propionamide, E conformation

1\1\GINC-KOALA\FOpt\RB3LYP\6-31G(d)\C4H9N1O1\KMM\21-Nov-1997\0\\#N B3L

YP/6-31G* OPT\\E-N methyl propionamide B3LYP/6-31G* opt\\0,1\O,0.23986

19654,0.013856173,-1.6934897176\C,0.2404093886,0.0212767135,-0.4683061

16\N,1.4175939103,0.0248931127,0.2373078363\C,1.5835165753,-0.10816854

11,1.6738407078\C,-1.0450920344,0.0469880849,0.3571493534\C,-2.2951361

679,0.0325240973,-0.5206203193\H,0.9698917438,0.6210564124,2.213111264

8\H,1.3300237669,-1.1120468683,2.0438583206\H,2.6287244427,0.090694751

1,1.9236444992\H,2.2371086645,-0.0555530812,-0.3507691387\H,-1.0449832

38,-0.8103998096,1.0451824296\H,-1.0353735177,0.9393866752,0.999161585

5\H,-2.3230756406,-0.865303223,-1.1444277897\H,-2.3078559763,0.8944576

365,-1.1932934854\H,-3.1986999099,0.0568842065,0.0979134458\\Version=I

BM-RS6000-G94RevD.4\HF=-287.8341998\RMSD=8.416e-09\RMSF=7.383e-06\Dipo

le=0.4099702,-0.0754138,1.4126798\PG=C01 [X(C4H9N1O1)]\\@
